# Supplementary material for: Neutralizing antibody responses elicited by SARS-CoV-2 mRNA vaccination wane over time and are boosted by breakthrough infection
Source: PubMed Central journal article supplement (PMC8939766; doi:10.1126/scitranslmed.abn8057), 2022-02-15
Supplement: scitranslmed.abn8057_sm.pdf [file scitranslmed.abn8057_sm.pdf]

Supplementary Materials for

**Neutralizing antibody responses elicited by SARS-CoV-2 mRNA vaccination wane over time and are boosted by breakthrough infection**

John P. Evans *et al.*

Corresponding author: Shan-Lu Liu, Liu.6244@osu.edu

DOI: 10.1126/scitranslmed.abn8057

**The PDF file includes:**

Figs. S1 and S2

**Other Supplementary Material for this manuscript includes the following:**

MDAR Reproducibility Checklist  
Data file S1

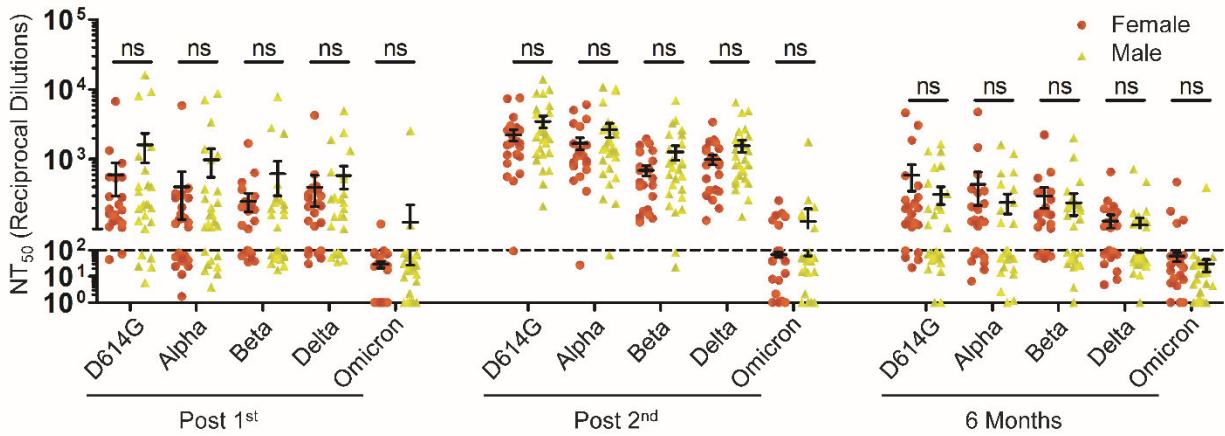

**Fig. S1. Sex did not impact neutralizing antibody responses elicited by mRNA vaccination.**

Neutralizing titer 50% (NT<sub>50</sub>) values for male (n = 26) and female (n = 22) health care workers (HCWs) were measured against indicated spike protein-pseudotyped lentiviruses at three time points post-vaccination; the horizontal dashed line indicates the limit of detection (NT<sub>50</sub> < 100). Significance was determined by two-way repeated-measures analysis of variance (ANOVA) with Bonferroni's correction; error bars represent means ± standard errors. ns: not significant.

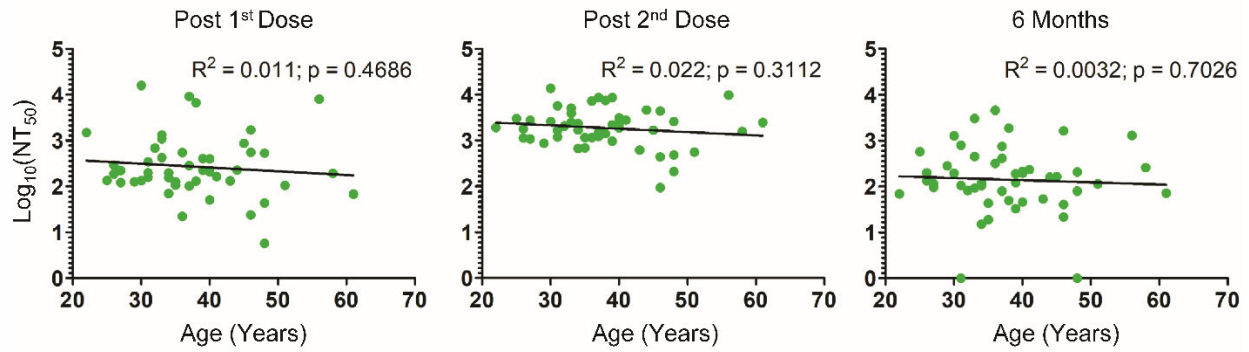

**Fig. S2. Age did not impact neutralizing antibody responses elicited by mRNA vaccination.**

$\text{Log}_{10}$ -transformed  $\text{NT}_{50}$  titers against D614G-SARS-CoV-2 spike protein-pseudotyped lentivirus were plotted against age (in years) for HCW samples ( $n=48$ ) collected post-first vaccine dose (left), post-second vaccine dose (middle), and six months post-second vaccine dose (right), with goodness of fit ( $R^2$ ) and significance ( $p$ -value) displayed as determined by linear regression with least-squares residual fit.

**Data file S1. NT<sub>50</sub> values.** NT<sub>50</sub> values are included for 48 HCWs for sample collections pre-vaccination, post-first mRNA vaccine dose, post-second mRNA vaccine dose, and 6 months post-second mRNA vaccine dose against pseudotyped lentivirus bearing the S of the D614G, Alpha, Beta, Delta, and Omicron SARS-CoV-2 variants. Additionally, the timing of anti-N positivity for 12 HCWs is indicated. The second tab includes descriptive documentation of column headers.
